# Supplementary material
Source: PubMed Central journal article supplement (PMC4250168)
Supplement: pnas.201413110SI.pdf [file pnas.201413110SI.pdf]

# Supporting Information

O'Connor et al. 10.1073/pnas.1413110111

**A**

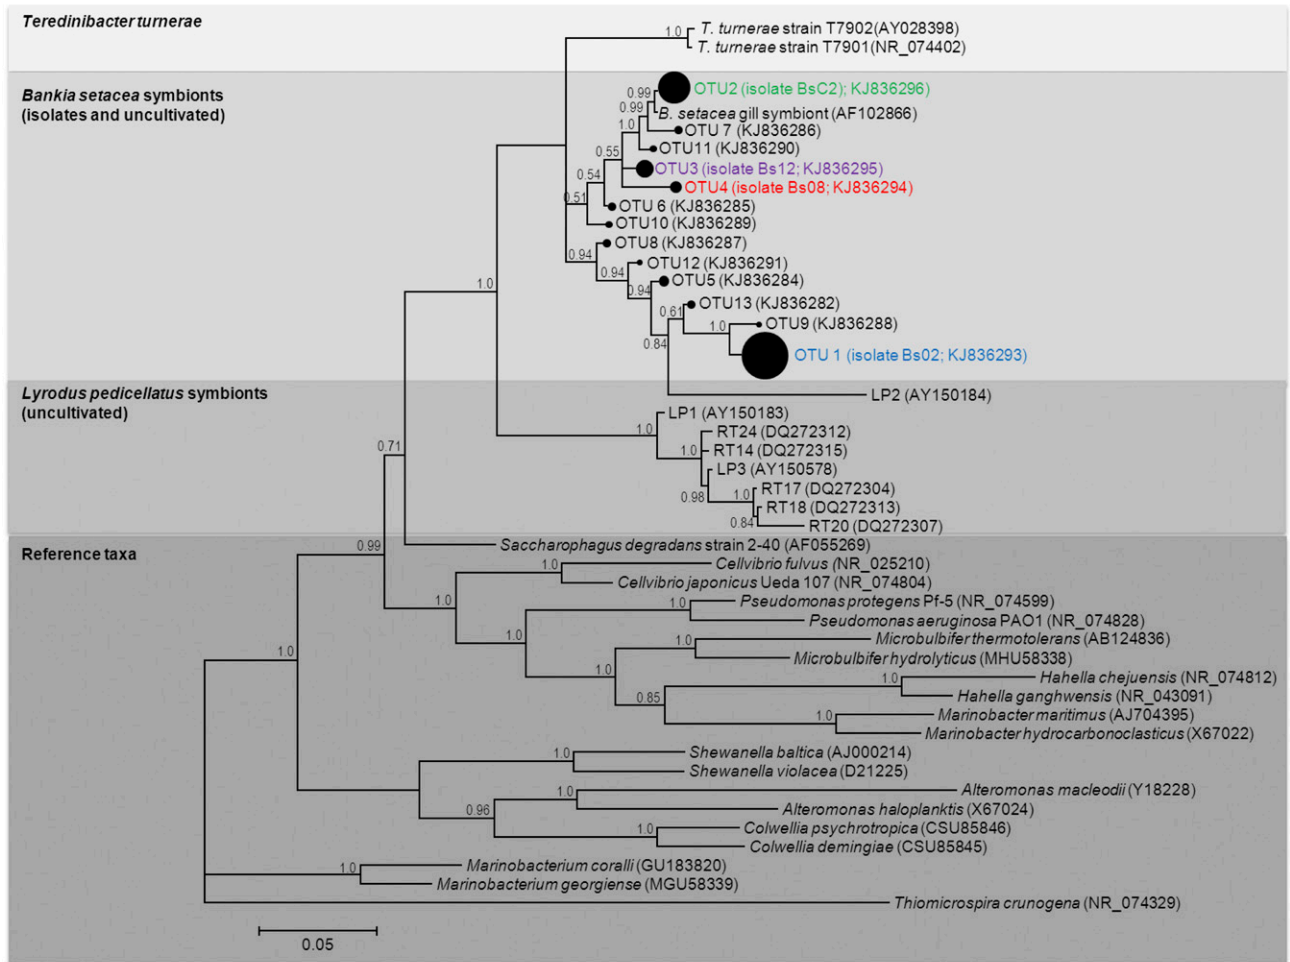

**B**

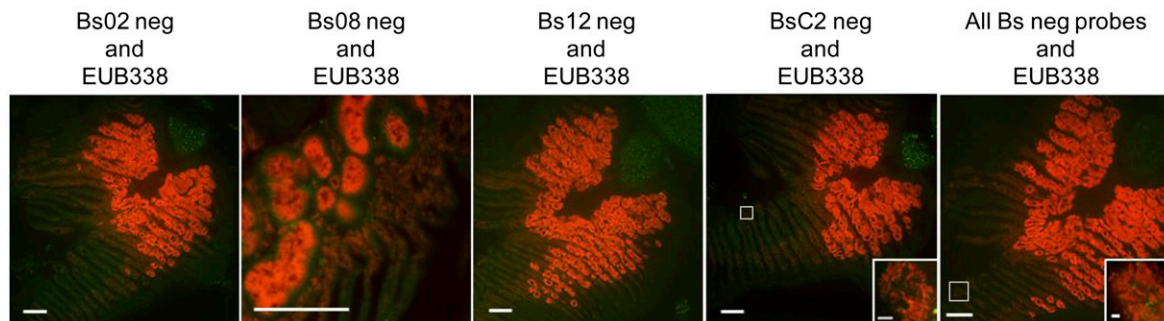

**Fig. S1.** Gill endosymbiont community of *B. setacea*. (A) Phylogeny of cultivated and uncultivated endosymbionts of *B. setacea* inferred by Bayesian analysis of 16S rRNA gene sequences (parent tree for Fig. 2A). OTUs were identified from among four isolate and 352 cloned 16S rRNA sequences by clustering at 99% identity. For OTUs with more than two members, one representative sequence (isolates and Genbank accession numbers are in parentheses) was included in the analysis: Circles at branch tips are proportional to the fraction of isolate and clone sequences contained in that OTU (Tables S3 and S4). Posterior probabilities are shown at nodes. (Scale bar: 0.05 substitutions per nucleotide position.) (B) Negative controls for FISH on gill tissue sections shown in Fig. 2B. Five gill tissue sections from *B. setacea* were dual-labeled with the indicated isolate-specific negative control probe (green) plus a probe broadly targeting the domain bacteria (EUB338, red). In this figure, images from the red and green channels are merged. Although strong hybridization was observed with probe EUB338 (positive control), no hybridization was detected for the four negative (neg) control probes. (Scale bar: 100  $\mu\text{m}$ .) (Insets) Details of boxed region in the corresponding section. (Scale bar: 5  $\mu\text{m}$ .)

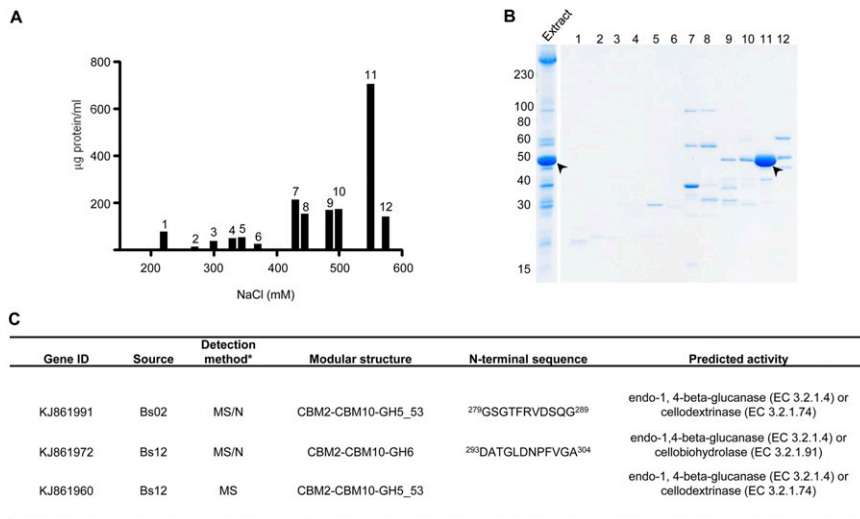

**Fig. S2.** Isolation and identification of cecum proteins. Cecum contents were pooled from 12 specimens of *B. setacea* and separated over a Qiagen Q column. Protein peaks (1–12) were collected. (A) Protein elution as a function of NaCl concentration. (B) Denaturing gel electrophoresis (SDS/PAGE) showing total cecum extract and proteins contained in peaks 1–12 (5 µL per lane). Molecular weight markers (in kilodaltons) are shown on the left. Arrowheads indicate bands corresponding to the GH5\_53 and GH6 catalytic modules from proteins KJ861991 (Bs02) and KJ861972 (Bs12). (C) Table describing endosymbiont-encoded proteins in fraction 11. MS, LC/MS/MS; N, N-terminal sequencing.

**Table S1. Phylogenetic composition of the *B. setacea* gill endosymbiont community: Pyrotag analysis of phylum/class-level diversity**

| Phylum/class          | Percentage of total | No. of reads |
|-----------------------|---------------------|--------------|
| Acidobacteria         | 0.01                | 216          |
| Bacteroidetes         | 0.00                | 45           |
| Proteobacteria        | 0.99                | 25,637       |
| Alphaproteobacteria   | 0.07                | 1,763        |
| Deltaproteobacteria   | 0.00                | 2            |
| Epsilonproteobacteria | 0.01                | 165          |
| Gammaproteobacteria   | 0.91                | 23,707       |
| Spirochetes           | 0.00                | 22           |
| Miscellaneous         | 0.00                | 14           |
| Total                 |                     | 25,934       |

**Table S2. Phylogenetic composition of the *B. setacea* gill endosymbiont community: Cluster analyses of 16S clone library using Qiime de novo**

| Cluster                                         | Sequences in cluster, % | Isolates included in cluster |
|-------------------------------------------------|-------------------------|------------------------------|
| Five largest OTUs clustered at 99% identity     |                         |                              |
| 1                                               | 46                      | Bs02                         |
| 2                                               | 23.6                    | BsC2                         |
| 3                                               | 6.8                     | Bs12                         |
| 4                                               | 3.1                     | Bs08                         |
| 5                                               | 2.3                     | —                            |
| Total number of OTUs                            |                         | 37                           |
| Number of OTUs represented by a single sequence |                         | 19                           |
| Five largest OTUs clustered at 98% identity     |                         |                              |
| 1                                               | 49.1                    | Bs02                         |
| 2                                               | 36.9                    | BsC2, Bs12                   |
| 3                                               | 3.4                     | Bs08                         |
| 4                                               | 4.8                     | —                            |
| 5                                               | 2.0                     | —                            |
| Total number of OTUs                            |                         | 11                           |
| Number of OTUs represented by a single sequence |                         | 3                            |
| Five largest OTUs clustered at 97% identity     |                         |                              |
| 1                                               | 52.3                    | Bs02                         |
| 2                                               | 42.9                    | Bs08, Bs12, BsC2             |
| 3                                               | 4.3                     | —                            |
| 4                                               | 0.3                     | —                            |
| 5                                               | 0.3                     | —                            |
| Total number of OTUs                            |                         | 5                            |
| Number of OTUs represented by a single sequence |                         | 2                            |

**Table S3. *B. setacea* gill endosymbiont metagenome statistics**

| Genome size | Gene count | Scaffold count | Scaffolds with at least one gene, % | Largest scaffold | No. of scaffolds over 10,000 bp | No. of bases in 100 largest scaffolds | Coding density, % | %GC content |
|-------------|------------|----------------|-------------------------------------|------------------|---------------------------------|---------------------------------------|-------------------|-------------|
| Metagenome* |            |                |                                     |                  |                                 |                                       |                   |             |
| 26,539,887  | 43,560     | 38,227         | 69                                  | 172,446          | 297                             | 4,787,625                             | 73.66             | 47.1        |

\*Sequenced on the Illumina and Roche Diagnostics 454 GS Titanium technology platforms.

**Table S4. *B. setacea* gill endosymbiont isolate genome statistics**

| Genome size     | Genome size | Gene count | Scaffold count | Scaffolds with at least one gene, % | Smallest scaffold | Largest scaffold | No. of scaffolds over 10,000 bp | No. of bases in scaffolds >10,000 bp | Coding density, % | %GC  |
|-----------------|-------------|------------|----------------|-------------------------------------|-------------------|------------------|---------------------------------|--------------------------------------|-------------------|------|
| Isolate genomes |             |            |                |                                     |                   |                  |                                 |                                      |                   |      |
| Bs02*           | 3,886,134   | 3,320      | 141            | 95.7                                | 500               | 655,607          | 15                              | 3,688,175                            | 87.7              | 47.8 |
| Bs08*           | 4,836,222   | 4,119      | 123            | 95.9                                | 514               | 415,715          | 33                              | 4,686,552                            | 86.6              | 47.1 |
| Bs12*           | 4,582,833   | 4,202      | 240            | 97.5                                | 502               | 421,677          | 43                              | 4,292,109                            | 87.5              | 45.9 |
| BsC2†           | 5,414,953   | 4,699      | 10             | 100                                 | 7,974             | 4,223,372        | 8                               | 5,398,333                            | 85.4              | 47.3 |

\*Sequenced on the Illumina platform.

†Sequenced on the PacBio platform.

**Table S5. Comparison of metagenome and isolate genome sequences: Metagenome reads mapped to assembled isolate genomes**

|                                                        | Bs02       | Bs08    | Bs12      | BsC2       | Unmapped reads | Total (mapped and unmapped) |
|--------------------------------------------------------|------------|---------|-----------|------------|----------------|-----------------------------|
| No. of combined read counts mapped to isolate assembly | 21,136,321 | 235,394 | 6,140,612 | 33,463,465 | 11,235,788     | 72,211,580                  |
| Percentage of total                                    | 27.65      | 0.29    | 8.39      | 46.06      | 17.61          | 100                         |

**Table S6. Comparison of metagenome and isolate genome sequences: Isolate reads mapped to each assembled isolate genome and the metagenome**

| Isolate reads     | Isolate genomes |         |         |         | Metagenome,* % |
|-------------------|-----------------|---------|---------|---------|----------------|
|                   | Bs02, %         | Bs08, % | Bs12, % | BsC2, % |                |
| Bs02 <sup>†</sup> | 95.85           | 0.51    | 1.16    | 0.42    | 88.43          |
| Bs08 <sup>†</sup> | 0.41            | 95.93   | 0.88    | 0.61    | 7.99           |
| Bs12 <sup>†</sup> | 0.63            | 0.88    | 90.12   | 0.40    | 78.92          |
| BsC2 <sup>‡</sup> | 0.69            | 0.99    | 0.85    | 85.92   | 63.16          |

\*Sequenced on Illumina and Roche Diagnostics 454 GS Titanium technology platforms.

<sup>†</sup>Sequenced on the Illumina platform.

<sup>‡</sup>Sequenced on the PacBio platform.

**Table S7. Summary of carbohydrate-active modules types found in isolate genomes and gill endosymbiont metagenome**

|                                            | Bs02 | Bs08 | Bs12 | BsC2 | Metagenome |
|--------------------------------------------|------|------|------|------|------------|
| <b>CBMs</b>                                |      |      |      |      |            |
| Total number of CBMs                       | 89   | 97   | 92   | 137  | 401        |
| Number of CBM families                     | 10   | 13   | 14   | 14   | 20         |
| CBMs specific for wood components, %       | 92.1 | 89.7 | 90.0 | 92.7 | 90.2       |
| <b>GH modules</b>                          |      |      |      |      |            |
| Total number of GH modules                 | 84   | 94   | 83   | 128  | 734        |
| Number of GH families                      | 28   | 33   | 26   | 35   | 46         |
| GH modules specific for wood components, % | 85.7 | 79.8 | 78.3 | 73.4 | 78.1       |
| <b>CE modules</b>                          |      |      |      |      |            |
| Total number of CE modules                 | 7    | 16   | 13   | 21   | 116        |
| Number of CE families                      | 5    | 8    | 7    | 7    | 11         |
| CE modules specific for wood components, % | 100  | 93.8 | 92.3 | 76.2 | 88.8       |
| <b>Auxillary activity (AA) families</b>    |      |      |      |      |            |
| AA10 (CBM33)                               | 3    | 3    | 2    | 1    | 14         |
| <b>Glycosyl transferase (GT) modules</b>   |      |      |      |      |            |
| Total number of GT modules                 | 40   | 43   | 42   | 35   | 307        |
| Number of GT families                      | 14   | 14   | 16   | 15   | 17         |
| <b>PL modules</b>                          |      |      |      |      |            |
| Total number of PL modules                 | 0    | 2    | 1    | 40   | 104        |
| Number of PL families                      | 0    | 2    | 1    | 5    | 5          |



**Table S9. Endosymbiont-encoded proteins found in *B. setacea* gill tissue by COG category**

| Accession no.                                                  | Source | Gene annotation                                       | Accession no. | Source | Gene annotation                                        |
|----------------------------------------------------------------|--------|-------------------------------------------------------|---------------|--------|--------------------------------------------------------|
| <b>Energy production and conversion (C)</b>                    |        |                                                       |               |        |                                                        |
| KJ943312                                                       | Bs08   | Malate dehydrogenase                                  | KJ943309      | Bs08   | Nitrogenase molybdenum-iron protein $\beta$ -chain     |
| KJ943310                                                       | Bs08   | Flavodoxin, long chain                                | KJ943335      | BsC2   | 2-Oxoglutarate dehydrogenase                           |
| KJ943307                                                       | Bs08   | Nitrogenase iron protein                              | KJ943336      | BsC2   | Isopropylmalate dehydrogenase                          |
| KJ943308                                                       | Bs08   | Nitrogenase molybdenum-iron protein $\alpha$ -chain   | KJ943359      | BsC2   | Malate dehydrogenase                                   |
| <b>Amino acid metabolism and transport (E)</b>                 |        |                                                       |               |        |                                                        |
| KJ943298                                                       | Bs02   | Nitrogen regulatory protein PII                       | KJ943355      | BsC2   | Ketol acid reductoisomerase                            |
| KJ943324                                                       | Bs12   | Nitrogen regulatory protein PII                       | KJ943338      | BsC2   | Nitrogen regulatory protein PII                        |
| KJ943333                                                       | BsC2   | D-3-phosphoglycerate dehydrogenase                    | KJ943339      | BsC2   | Nitrogen regulatory protein PII                        |
| KJ943344                                                       | BsC2   | L-glutamine synthase                                  | KJ943271      | M      | ATP/guanidophosphotransferase, C-terminal              |
| <b>Carbohydrate metabolism and transport (G)</b>               |        |                                                       |               |        |                                                        |
| KJ861987                                                       | Bs02   | CBM33-CBM10-CBM10                                     | KJ943287      | Bs02   | Glyceraldehyde-3-phosphate dehydrogenase               |
| KJ861991                                                       | Bs02   | CBM2-CBM10-GH5_53                                     | KJ943314      | Bs08   | Glyceraldehyde-3-phosphate dehydrogenase               |
| KJ861985                                                       | Bs02   | CBM10-CBM10-CBM60-GH10                                | KJ943311      | Bs08   | Transaldolase                                          |
| KJ861994                                                       | Bs02   | CBM2-CBM10-GH6                                        | KJ943300      | Bs08   | Xylose isomerase                                       |
| KJ861990                                                       | Bs02   | GH5_8-CBM10-CBM10-CBM10-GH6                           | KJ943330      | Bs12   | Glyceraldehyde phosphate dehydrogenase                 |
| KJ861982                                                       | Bs08   | CBM2-CBM10-GH5_53                                     | KJ943331      | Bs12   | Transaldolase                                          |
| KJ861978                                                       | Bs08   | CE6-CBM10-CBM10-CBM60-GH10                            | KJ943334      | BsC2   | Transaldolase                                          |
| KJ861963                                                       | Bs12   | CBM10-CBM10-GH10                                      | KJ943332      | BsC2   | Pyruvate kinase                                        |
| KJ861962                                                       | Bs12   | CBM10-CBM10-X241                                      | KJ943341      | BsC2   | Xylose isomerase                                       |
| KJ861972                                                       | Bs12   | CBM2-CBM10-GH6                                        | KJ943354      | BsC2   | Fructose-bisphosphate aldolase (EC 4.1.2.1)            |
| KJ861973                                                       | Bs12   | CBM33-CBM10                                           | KJ943275      | M      | D-glucuronate isomerase                                |
|                                                                |        |                                                       | KJ943270      | M      | Transaldolase                                          |
| <b>Translation, ribosome structure and biogenesis (J)</b>      |        |                                                       |               |        |                                                        |
| KJ943293                                                       | Bs02   | Ribosomal protein S7                                  | KJ943321      | Bs12   | Ribosomal protein S16                                  |
| KJ943294                                                       | Bs02   | Translation elongation factor 1A                      | KJ943317      | Bs12   | Ribosomal protein L7/L12                               |
| KJ943288                                                       | Bs02   | Ribosomal protein L19                                 | KJ943348      | BsC2   | Ribosomal protein S7                                   |
| KJ943292                                                       | Bs02   | Ribosomal protein L7/L12                              | KJ943315      | Bs12   | Ribosomal protein L14                                  |
| KJ943304                                                       | Bs08   | Ribosomal protein L7/L12                              | KJ943351      | BsC2   | Ribosomal protein L14P                                 |
| KJ943305                                                       | Bs08   | Translation elongation factor TU                      | KJ943352      | BsC2   | Ribosomal protein L6P                                  |
| KJ943316                                                       | Bs12   | Ribosomal protein L3                                  | KJ943347      | BsC2   | Ribosomal protein L12P                                 |
| KJ943323                                                       | Bs12   | Ribosomal protein S1P                                 | KJ943357      | BsC2   | Ribosomal protein L19                                  |
| KJ943322                                                       | Bs12   | Ribosomal protein L19                                 | KJ943349      | BsC2   | Translation elongation factor 1A                       |
| <b>Transcription (K)</b>                                       |        |                                                       |               |        |                                                        |
| KJ943280                                                       | Bs02   | Transcription termination factor Rho                  | KJ943301      | Bs08   | Transcription termination factor Rho                   |
| KJ943295                                                       | Bs02   | Cold shock DNA-binding module                         | KJ943328      | Bs12   | Transcription termination factor Rho                   |
| <b>Replication, recombination, and repair (L)</b>              |        |                                                       |               |        |                                                        |
| KJ943284                                                       | Bs02   | Bacterial nucleoid DNA binding protein HU             | KJ943318      | Bs12   | Bacterial nucleoid DNA binding protein                 |
| KJ943313                                                       | Bs08   | Bacterial DNA-binding protein                         | KJ943358      | BsC2   | Bacterial nucleoid DNA binding protein                 |
| <b>Cell wall structure, biogenesis, and outer membrane (M)</b> |        |                                                       |               |        |                                                        |
| KJ943326                                                       | Bs12   | Putative salt-induced outer membrane protein          | KJ943274      | M      | Outer membrane protein (porin)                         |
| KJ943353                                                       | BsC2   | UDP glucose pyrophosphorylase                         |               |        |                                                        |
| <b>Molecular chaperones and related functions (O)</b>          |        |                                                       |               |        |                                                        |
| KJ943279                                                       | Bs02   | FKBP-type peptidyl-prolyl <i>cis/trans</i> -isomerase | KJ943320      | Bs12   | FKBP-type peptidyl-prolyl <i>cis/trans</i> -isomerases |
| KJ943291                                                       | Bs02   | Chaperonin GroL                                       | KJ943337      | BsC2   | Chaperonin GroEL                                       |
| KJ943299                                                       | Bs08   | Chaperon protein DnaK                                 | KJ943346      | BsC2   | FKBP-type peptidyl prolyl <i>cis/trans</i> -isomerase  |
| KJ943306                                                       | Bs08   | Chaperonin GroL                                       | KJ943269      | M      | ATP-dependent protease Clp, ATPase subunit             |
| <b>Inorganic ion transport and metabolism (P)</b>              |        |                                                       |               |        |                                                        |
| KJ943282                                                       | Bs02   | TonB-dependent receptor                               | KJ943327      | Bs12   | Outer membrane receptor proteins, Fe transport         |
| KJ943289                                                       | Bs02   | TonB-dependent receptor                               | KJ943356      | BsC2   | TonB-dependent receptor                                |
| KJ943286                                                       | Bs02   | TonB-dependent receptor                               | KJ943343      | BsC2   | Cyanate hydratase                                      |

**Table S9. Cont.**

| Accession no.                                                                                        | Source | Gene annotation                               | Accession no. | Source | Gene annotation                               |
|------------------------------------------------------------------------------------------------------|--------|-----------------------------------------------|---------------|--------|-----------------------------------------------|
| KJ943283                                                                                             | Bs02   | Bacterioferritin                              | KJ943345      | BsC2   | TonB-dependent receptor                       |
| KJ943281                                                                                             | Bs02   | TonB-dependent receptor                       | KJ943342      | BsC2   | Phosphate ABC transporter                     |
| KJ943302                                                                                             | Bs08   | TonB-dependent receptor                       | KJ943276      | M      | TonB-dependent receptor                       |
| KJ943303                                                                                             | Bs08   | TonB-dependent receptor                       | KJ943272      | M      | TonB-dependent receptor                       |
| KJ943319                                                                                             | Bs12   | TonB-dependent receptor                       | KJ943277      | M      | Outer membrane receptor for ferrienterochelin |
| KJ943329                                                                                             | Bs12   | Outer membrane receptor for ferrienterochelin |               |        |                                               |
| Secondary metabolites biosynthesis, transport, and catabolism (Q)/lipid transport and metabolism (I) |        |                                               |               |        |                                               |
| KJ943350                                                                                             | BsC2   | Dehydrogenases with different specificities   |               |        |                                               |
| No functional prediction(s)                                                                          |        |                                               |               |        |                                               |
| KJ943285                                                                                             | Bs02   | DUF2780                                       | KJ943325      | Bs12   | Hypothetical protein                          |
| KJ943297                                                                                             | Bs02   | DUF3450                                       | KJ943340      | BsC2   | Hypothetical protein                          |
| KJ943273                                                                                             | M      | Hypothetical protein                          |               |        |                                               |
| Intracellular trafficking, secretion, and vesicular transport (U)                                    |        |                                               |               |        |                                               |
| KJ943290                                                                                             | Bs02   | Type IV pilus secretin                        | 2503998172    | Bs02   | MotA/TolQ/ExbB proton channel                 |
| KJ943278                                                                                             | Bs02   | General secretion pathway/protein C           |               |        |                                               |

M, found in metagenome only.









**Table S11. Sequences of primers and probes for amplification, hybridization, and cloning (5'–3')**

| Primer/probe name                                                    | Sequence (5'–3')                                |
|----------------------------------------------------------------------|-------------------------------------------------|
| <b>Primers for amplification and sequencing of 16S rRNA genes</b>    |                                                 |
| 27-F                                                                 | AGA GTT TGA TCM TGG CTC AG                      |
| 530-F                                                                | GTG CCA GCM GCC GCG G                           |
| 1055-F                                                               | ATG GCT GTC GTC AGC T                           |
| 800-R                                                                | TAC CAG GGT ATC TAA TCC                         |
| 1101-R                                                               | AGG GTT GCG CTC GTT                             |
| 1492-R                                                               | TAC GGY TAC CTT GTT ACG ACT T                   |
| 27-F'                                                                | AGA GTT TGA TCC TGG CTC AG                      |
| 1391-R                                                               | GAC GGG CRG TGW GTR CA                          |
| 4a-F                                                                 | TCC GGT TGA TCC TGC CRG                         |
| 926-F                                                                | AAA CTY AAA KGA ATT GAC GG                      |
| 1392-R                                                               | ACG GGC GGT GTG TRC                             |
| <b>Oligonucleotide probes for fluorescent in situ hybridization*</b> |                                                 |
| Bs02-AF488                                                           | CAC AGA TAG CAG GTA TTA ACC GCT                 |
| Bs02neg-AF488                                                        | CAC AGA TAG <b>AAG ATA</b> TTA ACC GCT          |
| Bs08-AF488                                                           | TCG AGT ATT AAT CAA CAC CCT TTC                 |
| Bs08neg-AF488                                                        | TCG AGT ATT AAT <b>AAA AAC</b> CCT TTC          |
| Bs12-AF488                                                           | CTA GAG ATC GTT GAC TTG GTG GGC                 |
| Bs12neg-AF488                                                        | CTA GAG ATC <b>GTA GAA</b> TTG GTG GGC          |
| BsC2-AF488                                                           | CTA GAG ATC GTA GTC TTG GTA GGC                 |
| BsC2neg-AF488                                                        | CTA GAG ATC <b>CAA GTA</b> TTG GTA GGC          |
| EUB338-AF594                                                         | GCT GCC TCC CGT AGG AGT                         |
| <b>Primers for cloning of GH5_53 catalytic domain</b>                |                                                 |
| GH5-F                                                                | CTA CCG TTG CGT TTG CTG GAT CCG GAA CTT TC      |
| GH5-R                                                                | TTT CAC TTC ACA GGT CAC CCA AAG GAA TTA CAT ACC |

Bold indicates mismatch in the negative control probe to the target sequence of the cognate probe. F, forward; R, reverse.  
 \*Probe name (isolate label) is given in the list of oligonucleotide probes for fluorescent in situ hybridization.

**Table S12. Sequences of amplification primers for gene-specific in vitro transcription/translation (5'–3')**

| GenBank accession no.                                                                | Primer name (catalytic module) | Gene-specific sequence (5'–3')*                 |
|--------------------------------------------------------------------------------------|--------------------------------|-------------------------------------------------|
| <b>Primers for amplification of templates for in vitro transcription-translation</b> |                                |                                                 |
| KJ861970                                                                             | GH5_2-F                        | GAC GTA CCG CCA CTC ACC GTT AGT GGC             |
|                                                                                      | GH5_2-R                        | GCC AAT ATC TAT CGT TGT TCC CCA G               |
| KJ861968                                                                             | GH5_8-F                        | GGT TTT TCG GTT TCA GGT ACT CAG CTG             |
|                                                                                      | GH5_8-R                        | ATA CAC AGA TGC ACG CTG AGC AGT TTG C           |
| KJ861985                                                                             | GH10a-F                        | AGC CGT AAC TAC CCA CCT TTC TTC GTG G           |
|                                                                                      | GH10a-R                        | TTA TAG TTA TCT ACC GAG GTA GTT CAT CAA CCA ATC |
| KJ861963                                                                             | GH10b-F                        | CCA AGT TTT CCA GCA TTT TTT GTT GGT AAT         |
|                                                                                      | GH10b-R                        | TTA TCG ACC TAGA TAA TCC ATT AAC CAA TC         |
| KJ861993                                                                             | GH11-F                         | CAA ACA CTT ACC TCC AAC CAA ACG GGC             |
|                                                                                      | GH11-R                         | TTA GCC TTC CGA TAC GGT GAT ATC GGA G           |

\*The sequence of the forward primers also includes (5' to the gene-specific sequence): 5'-GCG AAT TAA TAC GAC TCA CTA TAG GGC TTA AGT ATA AGG AGG AAA AAA TATG-3' encoding the T7 promoter, the Shine–Dalgarno sequence and the start codon. The sequence of the reverse primers also includes (5' to the gene-specific sequence) a 3' UTR for transcript stability: 5'-AAA CCC CTC CGT TTA GAG AGG GGT TAT GCT AG-3' and a stop codon if needed.

## Other Supporting Information Files

[Dataset S1 \(PDF\)](#)
