# Supplementary material
Source: PubMed Central journal article supplement (PMC4250168)
Supplement: pnas.1413110111.sd01.pdf [file pnas.1413110111.sd01.pdf]

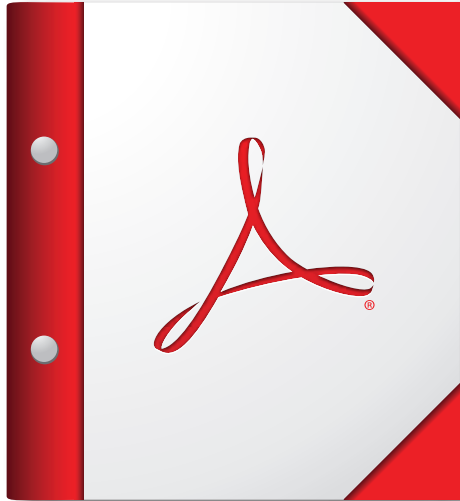

**For the best experience, open this PDF portfolio in  
Acrobat 9 or Adobe Reader 9, or later.**

[Get Adobe Reader Now!](#)
